# Supplementary material
Source: publisher figshare collection journal article supplement (https://gsapubs.figshare.com/ndownloader/files/38206803)
Supplement: Supplementary file 1 [file 38206803]

## Sheet: Sheet1
180721FL1		BDJ1ES1		Leadville SG.		SJMT1		Temple Butte SG.		Tonka		Wood River Basin SG.		08BC-1/2		09-CM-699		10DM14		180713SWC3		BCRA-01-10		BDJLS1		CC01		Molas SG.		Surprise Canyon SG.		Tensus-Dimple SG.		06GC147		10DM15		13ROB-1		18BH1		1BDK480		SNFUM1		Cutler_south SG		1MHRCT201
388.666	3.05448	1045.32	124.555	515.163	8.48571	783.63	12.2257	403	11	1764.36	28.2959	1102	37	318.868	11.9155	380.031	10.3853	2728.75	4.36366	400.211	4.22008	364.3	12.1	148.368	10.7259	389.644	8.53964	296.331	12.4196	309.368	7.71291	756.9	28.7	451.643	8.94625	508.884	20.5903	323.084	6.04098	1650.61	16.6684	427.175	23.0531	589.889	15.7677	343.683	24.1595	280.396	12.6194
394.266	3.49502	1080.03	71.7511	1107.19	12.4625	1109.23	41.3104	426	13	1852.48	10.9098	1476	13	325.872	10.3912	381.3	14.297	412.826	5.46354	406.27	3.71544	380.7	22.9	202.325	14.6896	507.224	8.40655	297.488	13.7443	451.148	11.971	2718.6	14.4	464.05	2.33015	1097.48	41.4734	342.399	8.52688	413.646	3.27537	509.13	15.3483	929.956	32.4779	561.5	33.2706	292.473	29.9983
396.955	4.03086	1286.6	174.728	1126.68	12.2737	1263.33	36.0681	509	15	1784.33	11.0539	1744	13	395.89	2.45747	389.979	11.8658	1792.95	51.9189	408.526	3.87145	406.6	13.6	205.106	13.2368	517.34	10.2595	301.201	5.40236	460.715	13.6463	789.9	21	653.107	14.5138	1495.09	38.1174	350.784	7.66204	2301.25	37.6456	1243.16	221.763	1127.77	22.0315	1443.77	54.2073	303.177	23.2278
402.398	3.97906	1315.89	67.8058	1136.03	18.7233	1310.09	55.7903	515	13	1964.25	19.6398	1748	18	425.048	4.15452	392.928	8.78331	531.934	11.5024	412.612	3.6841	408.9	21.7	268.955	18.5392	523.491	8.84049	302.795	8.16076	465.067	11.4812	1127.5	138.2	665.941	14.268	2747.76	6.7969	369.222	10.8766	1124.99	13.5828	1292.88	80.9264	1460.39	38.5497	1506.82	107.747	307.811	20.1415
407.025	5.12464	1332.4	144.017	1143.81	16.1854	1363.92	46.2469	518	18	1962.55	14.173	1760	11	453.679	2.27811	406.663	16.2216	540.321	25.5639	413.006	3.71301	418.8	8	298.634	18.5433	524.529	9.08676	314.551	17.1255	613.889	9.25103	692.2	17.1	870.114	21.0133	2843.12	34.6132	379.476	6.12509	2817.88	7.64606	1296.12	107.834	1490.84	35.4349	1509.36	88.4736	311.054	19.7511
407.553	3.69741	1333.49	90.5402	1152.39	17.7889	1392.35	32.0207	583	13	1775.22	8.72235	1763	15	492.342	3.69731	414.138	12.9395	610.428	11.8792	416.14	3.15521	435.1	11.2	315.284	17.109	525.598	9.46084	314.899	8.7447	630.312	9.80372	999.5	87.1	884.126	22.1722	1660.8	60.3559	425.535	13.7971	1068.45	25.4708	1300.94	192.41	1500.21	50.1526	1550.51	41.9896	317.678	18.3018
410.81	3.98175	1336.56	207.532	1192.98	23.7511	1409.13	42.8992	1243	47	2041.61	11.9861	1766	15	493.287	3.65663	432.404	5.91684	355.197	6.12887	416.374	4.45837	446	14.5	454.03	29.8872	526.826	8.98704	316.642	15.5354	634.063	9.71599	1047.4	29	954.959	27.3316	1142.06	61.4491	511.696	26.5464	3375.49	11.2938	1301.11	141.507	1555.71	52.2202	1553.9	94.3502	324.74	15.9614
422.693	4.51913	1355.21	88.78	1337.61	19.1774	1417.58	35.7501	1333	30	2626.17	7.42233	1767	14	613.683	8.72214	441.905	9.01204	1625.73	16.6667	423.55	3.47548	446.6	11.7	466.389	24.8429	530.48	12.1522	325.675	11.2878	641.949	14.7661	654.1	16.9	989.301	51.4729	1992.41	22.2458	527.078	7.75658	1062.83	12.6683	1302.84	154.667	1612.26	46.3974	1554.66	40.7579	325.876	22.4464
431.518	4.22804	1370.38	58.8213	1347.92	15.2605	1426.39	21.934	1353	31	2479.08	14.5054	1768	12	704.154	3.3353	447.078	8.89872	1274.47	19.2282	425.248	4.7493	448	16.3	482.425	26.5058	530.689	10.7802	331.861	15.0696	773.974	16.2783	554.1	31.5	1024.79	27.3748	1844.6	39.8833	557.049	9.14248	1448.84	18.5811	1305.65	220.571	1614.1	44.4318	1580.74	78.5763	330.861	16.5613
436.421	3.24687	1374.85	97.7477	1358.65	13.1	1447.22	56.2367	1360	38	2075.97	7.25785	1770	13	707.948	15.2195	449.515	9.36619	1704.44	15.7903	426.173	3.98716	457.9	12.3	484.754	32.2784	1010.16	14.9667	332.604	11.4745	1037.45	29.5517	502.8	8.7	1078.18	73.8904	2422.79	14.3661	563.912	24.6457	1023.92	72.9747	1305.65	157.442	1631.06	37.1553	1585.48	64.4343	336.118	17.1893
437.373	3.62323	1376.94	88.1262	1363.03	16.2777	1464.34	65.4915	1367	37	2717.45	7.47601	1771	14	727.444	28.3417	449.75	12.211	1566.06	12.5523	427.048	2.94543	464.1	28.4	495.009	24.5238	1364.42	16.1813	354.032	11.0618	1038.74	36.9269	1454.4	28.9	1095.34	64.847	1970.11	6.94912	586.477	9.66163	434.83	5.23931	1306.26	116.876	1632.53	68.5738	1593.47	92.3087	345.864	34.7971
451.291	6.21091	1384.74	113.678	1363.78	16.6787	1468.74	29.7825	1370	49	2085.98	10.9405	1774	13	852.404	4.39155	450.873	9.6268	1646.45	13.1345	429.577	3.26789	484	23.2	505.206	25.3216	1370.11	17.9406	357.017	8.79246	1048.29	22.1634	673.2	17.3	1096.01	50.346	1091.8	23.3893	587.097	40.4997	1862.22	8.09243	1306.28	104.292	1638.32	84.8344	1601.34	79.6495	351.112	31.4236
453.718	4.33829	1393.99	94.7373	1365.51	14.9987	1470.94	55.1618	1373	31	1954.28	44.2302	1784	13	916.261	23.4885	460.656	10.3974	2620.92	5.19885	429.95	3.9549	505.9	13	524.15	30.1024	1387.15	15.7017	365.59	14.1696	1076.83	14.7294	1885.9	12.3	1099.24	52.7673	1502.33	10.668	588.205	5.95405	1122.55	18.5782	1307.92	101.611	1639.36	59.9506	1603.62	100.047	354.11	15.406
458.366	4.27996	1401.85	74.2545	1371.92	15.8002	1481.83	34.0016	1429	50	1907.19	23.6311	1788	13	971.995	13.4438	461.388	10.0439	1515.37	22.1227	431.416	5.19341	560.8	16.7	541.575	19.8814	1402.28	15.6826	367.89	8.06135	1083.82	13.0536	547.2	8.3	1100.4	44.3083	1737.27	14.8634	593.667	5.45957	1160.5	76.088	1309.18	98.3632	1642.65	85.3806	1637.78	43.846	358.236	22.1322
466.352	4.79148	1442.06	69.5084	1375.5	14.914	1483.22	63.7831	1437	38	1954.56	12.2166	1798	11	1029.62	20.0491	464.634	7.53304	1512.39	22.1785	436.432	4.56723	815.1	40.2	552.787	24.6416	1417.28	15.0218	369.179	10.9445	1089.47	24.5493	579.2	27.2	1109.52	45.7227	1760.79	11.2028	600.273	13.7901	1799.28	9.21336	1309.59	194.687	1645.57	41.9679	1643.52	46.9149	359.904	23.0107
466.377	4.79623	1483.08	170.544	1389.95	18.0948	1495.64	79.562	1440	32	1844.71	14.8957	1799	12	1053.2	47.159	471.305	27.9037	1255.67	8.6576	440.412	5.26638	935.5	9.1	564.853	16.846	1419.79	15.6597	372.442	7.22555	1100.43	17.7726	614.6	17.6	1109.78	49.2963	1514.97	29.9812	606.675	20.0908	964.223	12.8635	1317.77	114.904	1649.3	37.7398	1647.4	64.2911	370.094	22.9341
475.68	3.55797	1496.7	228.073	1392.39	14.9822	1499.27	81.0048	1452	33	1870.44	32.7896	1802	14	1080.88	31.3379	476.533	10.8771	2050.31	11.5443	458.742	3.20842	952.3	74.3	579.532	38.9812	1420	14.6236	380.826	17.4877	1102.32	22.8857	734.5	12.1	1123.11	61.7114	1035.54	23.7705	609.829	46.3821	1839.92	6.84709	1319.44	112.993	1652.81	33.6506	1647.45	44.2464	371.85	23.7983
552.964	5.05745	1525.84	102.076	1410.53	17.3761	1581.44	39.0267	1453	59	1824.72	24.772	1804	9	1100.86	21.9681	481.767	7.70527	1777	22.7765	461.104	4.33331	963.9	170.2	598.177	20.4683	1422.49	14.999	381.248	10.3963	1116.16	49.7305	496	6.3	1137.14	30.1567	1056.38	139.118	611.49	13.0455	1983.91	8.20931	1324.2	95.3842	1653.3	43.2435	1649.2	86.5291	380.85	18.8542
975.863	25.9921	1539.18	153.178	1412.59	14.6596	1594.81	35.203	1457	41	1923.29	23.4633	1808	14	1102.35	36.6238	488.438	19.8479	1499.41	26.7443	463.249	4.93731	977.5	155.2	1238.67	75.9637	1423.61	15.3439	382.126	22.6027	1125.5	31.635	1076.2	13	1139.14	26.3664	1958.49	6.4414	647.214	9.51025	1264.59	65.6001	1324.51	97.0367	1653.45	49.5683	1649.34	58.3384	383.463	28.9427
986.07	14.9248	1568.39	198.774	1418.66	14.2743	1617.44	107.389	1488	50	1795.5	13.484	1810	12	1184.25	31.6603	539.558	4.76308	2987.78	4.60096	470.717	4.98638	1007.3	75.5	1242.57	74.5969	1423.87	15.4186	383.505	7.20127	1146.75	9.97173	570.1	8.1	1144.46	38.4559	1618.14	21.7406	762.358	7.24927	270.044	7.55663	1325.15	120.367	1656.71	121.496	1651.01	90.0999	387.446	23.2987
989.337	12.8609	1586.5	142.83	1420.28	17.3722	1618.61	32.7415	1492	89	1811.68	13.1278	1811	14	1296.68	26.4732	553.244	20.5181	1069.74	10.5554	557.2	4.75459	1012.5	43.9	1259.01	62.888	1425.37	13.81	383.542	10.198	1159.04	39.0374	1244	29.7	1147.87	41.0388	428.743	8.36115	769.117	25.7199	614.445	7.20739	1325.59	71.7019	1656.82	55.1244	1651.12	61.062	394.425	20.1555
995.302	18.9219	1592.95	168.03	1422	12.1641	1618.89	44.1649	1496	63	1776.73	18.4234	1816	17	1305.45	17.8922	588.093	23.1805	504.323	13.3276	609.878	5.44425	1015.8	35.1	1277.64	60.0964	1426.58	18.4054	384.643	13.0558	1161.53	60.1196	624	13.7	1156.1	31.4301	2544.45	10.1332	991.796	42.5074	1497.23	16.6108	1325.81	94.7872	1657.15	44.5341	1655.6	107.901	396.203	33.4153
997.456	17.6782	1592.99	141.167	1424.25	18.6548	1692.22	47.1844	1502	24	1830.94	47.1306	1817	15	1314.07	25.1053	769.48	20.052	1635.23	10.5549	926.815	14.1654	1025.9	29.8	1284.75	80.9765	1428.12	16.5874	389.866	10.1278	1194.91	50.7764	1551.5	30.3	1158.79	41.7361	1195.46	39.2913	996.981	114.43	1683.28	5.41694	1326.84	129.71	1658.06	43.0238	1655.76	59.7091	397.396	12.7603
1012.21	16.3748	1601.35	137.467	1426.33	14.2743	1693.14	47.0796	1530	77	2655.63	9.97236	1820	16	1315.83	24.9215	821.544	11.2986	1676.19	17.8696	963.469	38.8417	1029.4	65.2	1288.04	48.6221	1428.89	13.1599	394.728	9.80423	1197.93	35.2674	585.6	7.4	1177.38	50.8562	719.84	57.1845	1033.33	70.061	1645.2	6.13457	1329.67	106.44	1658.77	53.2359	1656.16	33.0549	399.826	34.5457
1013.25	13.2466	1601.72	206.63	1427.94	12.385	1700.73	31.2324	1589	67	2525.53	2.6115	1820	12	1347.86	13.5341	898.805	109.218	1948.7	15.9118	972.516	12.0143	1031.7	60.4	1288.78	66.3629	1429.25	16.394	394.844	7.00284	1205.34	35.7146	2699.1	13.8	1178.91	42.5394	1807.61	21.6826	1039.9	79.4207	1458.04	11.4846	1330.27	105.616	1658.99	38.9221	1656.3	40.9003	400.887	20.7483
1021.83	11.4528	1603.5	94.7476	1429.74	15.203	1722.45	26.0512	1636	147	2043.51	26.699	1820	15	1357.87	24.4865	936.707	62.3268	2399	7.25926	979.396	12.5197	1033.7	14.2	1288.9	101.738	1430.11	14.618	395.347	15.5462	1251.24	49.045	554.4	10.8	1193.36	23.8707	1873.71	7.39528	1041.21	44.9588	372.009	7.06189	1332.16	91.2429	1659.34	51.0229	1657.6	101.96	402.113	18.3001
1028.6	13.1157	1609.27	63.6521	1430.42	13.9373	1722.96	32.6048	1648	120	2554.7	24.0331	1832	17	1381.67	22.4838	951.495	52.9176	1344.5	8.10431	983.367	13.1902	1037.3	30.2	1291.95	54.0712	1430.74	16.7138	397.932	21.0822	1280.93	57.8715	560.6	5.5	1193.71	58.8731	391.129	40.9785	1043.19	30.2803	1794.92	3.00035	1332.55	82.6038	1659.98	49.2353	1660.11	68.0584	403.978	22.3474
1040.07	10.4273	1611.96	166.319	1431.11	12.849	1724.93	28.622	1655	53	1134.65	57.6835	1833	13	1389.77	9.61019	976.449	109.403	1047.43	17.9431	996.488	15.9136	1041.7	77.7	1295.42	48.7292	1430.88	16.1687	398.303	9.90622	1343.9	33.8766	1184.4	26	1200.6	51.8328	1620.06	33.3152	1083.06	129.548	1974.97	2.0632	1332.94	126.896	1662.99	43.221	1660.12	23.2225	404.848	25.3038
1043.8	17.172	1612.8	115.76	1437.53	13.1188	1729.98	84.6953	1656	65	1851.35	10.0014	1838	13	1402.15	16.8924	983.857	72.2911	404.021	8.57601	1005.94	24.4753	1048.9	54.6	1301.41	52.0471	1431.99	11.6782	398.7	13.6121	1370.29	43.3861	560.5	8.9	1207.27	53.5116	1967.49	40.6177	1110.79	26.7381	1157.44	52.8172	1333.36	267.258	1663.14	53.7483	1660.92	75.269	405.225	18.9222
1043.98	14.6557	1619.16	89.5041	1457.59	15.0884	1731.63	28.3883	1659	53	2762.58	3.94686	1838	12	1418.32	17.8439	997.377	24.2074	1350.63	28.0467	1009.82	13.0863	1051.8	38.5	1302.47	89.5273	1433.17	14.0205	399.343	8.73014	1413.97	66.302	2623.3	8.1	1210.34	17.9287	1116.49	71.4317	1123.37	55.9582	1934.79	7.14979	1333.71	145.836	1666.12	31.4077	1662.44	44.3616	406.088	19.3373
1049.96	19.8176	1620.34	81.0367	1623.23	13.9763	1732.05	46.5364	1659	43	1957.35	13.8448	1840	14	1426.75	28.1595	1002.65	51.3275	1645.98	23.8505	1013.48	13.7245	1053.9	85.1	1303.5	56.7734	1434.22	13.1437	401.348	26.2371	1419.62	14.394	2687.4	11.8	1264.86	49.8457	1087.49	26.2025	1137.6	16.5068	1641.49	34.3457	1333.93	144.208	1666.59	36.2646	1664.49	51.9584	406.725	15.7324
1051.96	12.5735	1620.72	123.897	1633.63	12.3968	1751.21	35.4668	1661	54	1892.54	27.1552	1840	15	1432.18	35.693	1018.79	11.3139	1663.08	10.5194	1014.42	18.892	1055.7	64.8	1306.54	90.1023	1434.28	15.6846	402.31	12.8095	1428.3	13.5254	719.3	19.2	1267.41	37.1911	1451.46	30.231	1154.01	23.1479	1537.84	6.5166	1334.3	99.0335	1667.01	53.8579	1665.07	37.8174	408.087	16.0974
1052.28	9.74297	1621.71	140.002	1670.46	13.5242	1752.25	41.4814	1663	29	2008.51	10.8737	1840	13	1434.19	19.4834	1023.05	58.2004	443.152	13.3428	1021.82	14.0419	1059	122.1	1308.27	102.223	1434.85	14.1355	402.378	8.70655	1440.07	14.7604	474.5	9.3	1286.19	43.1409	1296.85	78.1151	1176.18	43.4398	1642.38	10.109	1334.32	95.8903	1669.41	55.9569	1667.07	75.9709	408.959	22.2707
1059.06	13.4517	1624.24	61.4178	1675.1	10.9688	1756.32	23.6122	1666	68	2696.61	11.1126	1847	17	1435.18	31.6813	1030.01	27.514	1506.54	13.3075	1028.34	17.4297	1061	69.6	1311.44	70.2871	1435.72	18.166	405.829	13.8463	1443.08	58.988	482.5	4.9	1359.13	34.6916	2021.49	22.5715	1184.16	20.4204	1706.49	3.63438	1334.79	117.205	1670.61	28.3703	1667.18	69.4173	410.045	14.1639
1059.08	10.6203	1625.48	166.254	1676.77	13.059	1761.55	24.1571	1667	83	1886.49	16.6859	1854	19	1441.62	11.4468	1036.99	61.2767	2689.31	14.1235	1031.86	14.0205	1064.2	36	1311.72	54.3598	1436.82	14.6105	406.695	7.79957	1445.72	8.1049	1459.5	9.3	1370.1	51.4119	1778.93	39.5669	1186.48	26.0702	1404.89	27.0935	1336.78	108.783	1671.75	43.716	1669.93	49.4582	412.928	23.7871
1062.29	11.203	1629.07	144.671	1680.44	17.1503	1773	30.0934	1674	46	2088.66	18.5765	1861	13	1444.52	30.3014	1040.75	48.6104	1874.76	10.8926	1035.45	19.8444	1066.4	45.9	1313.93	63.0689	1437.87	12.1798	407.514	8.25546	1452.74	28.6317	1144.4	65.5	1380.54	32.0428	1501.65	8.54045	1209.48	17.6736	1126.85	26.9572	1338.75	231.494	1672.46	82.0054	1670.98	63.7739	413.167	26.7366
1064.98	18.2515	1634.98	185.282	1691.66	17.0604	1773.28	25.1257	1681	122	1817.69	49.1441	1867	12	1450.79	22.4621	1047.34	69.5454	2856.71	8.35928	1045.17	12.5416	1069	48.7	1313.97	102.69	1437.88	10.5045	410.478	25.1554	1463.61	20.3769	633.1	14.3	1387.11	57.8271	395.485	7.63365	1210.81	16.6287	1079.71	35.5066	1341.99	130.856	1673.76	103.656	1672.98	45.0683	413.364	16.7348
1073.05	11.3882	1637.3	64.3999	1701.23	14.8792	1775.47	25.7538	1684	50	1861.74	35.4626	1891	13	1454.37	44.9024	1049.27	29.5874	1509.66	19.2729	1046.65	9.90448	1074.7	27.7	1314.13	74.6662	1440.4	14.6763	410.624	12.5085	1627.32	31.1355	535.1	6.5	1402.33	46.8075	2773.35	5.9852	1225.66	107.862	1722.06	6.56515	1343.19	223.04	1674.47	65.2036	1673.06	69.4343	415.41	22.5969
1073.06	15.715	1638.31	184.779	1712.01	12.9949	1775.55	36.1406	1692	22	1883.66	35.9217	1891	15	1459.44	33.4755	1049.47	24.5487	345.509	10.9704	1046.74	14.6628	1075.8	25.7	1321.21	116.87	1441.84	15.8554	412.401	9.23869	1627.77	19.9687	1043.1	82.7	1414.14	48.3892	3314.22	13.9992	1232.25	44.6651	642.587	5.2381	1343.38	275.573	1674.96	31.986	1673.22	70.3617	416.313	22.5795
1075.99	12.1067	1638.7	133.691	1739.17	13.9933	1788.54	25.0237	1694	28	2602.52	5.50019	1892	13	1516.48	22.6586	1051.44	171.271	1530.96	14.9313	1057.45	17.5644	1076.2	21.4	1321.42	42.1255	1443.49	16.8755	414.067	8.27903	1636.46	18.9011	1048.4	39.4	1421.01	45.75	1835.87	40.486	1238.65	14.4614	1800.84	8.36587	1344.11	131.398	1675.58	43.3464	1673.83	35.1431	426.824	19.3876
1082.95	11.1719	1640.16	79.4765	1746.05	13.4062	1812.18	22.1921	1694	41	1842.35	34.9108	1895	16	1618.31	41.3318	1062.09	73.0962	1187.41	12.7208	1057.82	35.3056	1079.3	43	1326.26	84.5221	1443.53	16.4103	415.539	9.97322	1637.92	11.5564	1004.9	41.7	1444.28	37.6608	432.959	11.2828	1243.52	23.8597	1639.43	8.90875	1345.22	162.858	1676.31	68.3448	1674.06	34.1706	430.409	32.2332
1085.6	21.2059	1641.79	121.01	1750.63	13.3213	1814.84	61.178	1695	31	1810.91	31.9986	1900	13	1636.56	18.4446	1063.09	30.7534	1930.19	12.7183	1059.34	18.4116	1081.2	28	1327.33	39.904	1443.86	12.2755	415.778	19.8016	1641.57	23.9472	817.9	15.3	1475.21	23.9647	1413.39	61.048	1339.43	8.43841	1761.41	34.639	1345.74	71.3271	1676.94	54.7708	1674.46	70.7426	434.848	28.0361
1123.9	12.3981	1642.65	83.3586	1752.34	11.9639	1815.5	27.8815	1699	51	2005.54	10.2678	1902	15	1638.4	20.7973	1064.03	27.2301	548.235	75.3548	1067.6	15.7951	1088.3	66.4	1327.44	72.5759	1444.81	17.5039	418.004	10.3542	1643.97	23.2818	1033.3	23.2	1494.43	30.109	1904.2	14.4938	1378.76	14.5255	2425.38	9.16667	1346.14	107.434	1677.32	60.3331	1675.45	82.0018	434.9	49.0261
1129.15	12.6018	1642.79	50.0001	1759.42	13.6592	1818	27.8059	1700	53	2603.41	30.3024	1903	15	1641.89	26.9198	1075.17	35.8388	1219.46	10.9936	1068.69	11.476	1090	33.8	1332.61	81.3194	1445.11	14.4213	419.138	8.01669	1645.27	23.4835	619.9	14.7	1540.3	32.099	1772.9	12.9548	1485.5	66.9755	1798.23	14.0118	1347.33	124.687	1678.19	56.8503	1676.16	85.0265	435.469	16.7518
1138.94	19.1577	1642.79	124.275	1762.03	11.4915	1833.93	44.5131	1704	26	1789.99	56.1356	1905	12	1642.91	28.4949	1090.52	38.611	485.908	21.3244	1075.27	12.0829	1094.4	44.5	1337.69	95.7515	1446.06	12.6173	421.949	8.24491	1665.07	26.0235	1767.7	8	1547.27	32.7416	1810.15	76.7993	1519.26	13.1407	1508.23	12.7961	1347.8	99.1789	1680.11	36.1808	1678.4	34.7632	440.721	13.1695
1146.04	14.5654	1644.78	81.9238	1762.04	11.2683	1842.11	38.8715	1704	35	1915.12	14.0612	1908	14	1645.46	16.697	1101.29	54.4594	2370.03	4.45769	1077.86	14.6091	1097.7	34.5	1339.15	61.8562	1446.66	18.9623	422.94	20.4548	1674.66	25.7317	624.2	9.8	1550.31	38.2533	2998.18	3.79287	1573.67	33.8489	1622.37	15.153	1348.33	244.934	1680.4	30.313	1678.68	50.4855	448.826	17.4331
1147.09	16.5162	1646.98	114.258	1767.55	12.8493	1844.66	52.8183	1705	43	1845.99	14.87	1911	13	1646.46	27.829	1127.59	60.0367	2175.17	4.83789	1088.36	15.1757	1098.8	83.8	1339.85	73.5351	1447.34	12.7633	423.864	8.48949	1675.24	6.41468	608	8.9	1556.18	18.2535	1989.22	16.2461	1587.25	66.4159	895.706	29.0909	1348.87	86.001	1681.37	56.6349	1679.94	64.1939	450.12	23.2989
1157.89	16.85	1646.98	70.7533	1770.74	11.4357	1849.66	38.3892	1707	36	1936.87	10.7698	1912	16	1647.33	16.1428	1128.84	31.4503	2344.93	5.95889	1106.06	14.1588	1100	75.8	1342.69	65.7577	1447.89	14.4693	424.751	16.5123	1675.54	22.0152	1243.9	22.7	1560.03	30.958	1858.93	5.20816	1602.78	108.074	1786.67	13.3546	1348.98	139.045	1682.15	70.9711	1680.62	58.1748	469.555	35.7183
1159.11	11.649	1647.8	74.6567	1771.35	13.9221	1856.61	30.8173	1708	34	1808.15	8.15991	1915	10	1648.37	14.471	1129.09	119.777	1547.13	11.3374	1113.72	9.58696	1108.3	28.3	1345.41	56.2426	1449.74	15.9447	425.439	6.88585	1677.6	11.8921	940.2	192.5	1562.78	35.1397	3511.59	4.3312	1633.25	18.0649	1736.96	14.6945	1349.2	113.111	1682.34	46.3395	1680.97	37.4296	481.804	24.1984
1165.2	14.5641	1649.03	133.949	1771.79	12.557	1882.11	30.3099	1708	39	2190.47	14.0266	1915	12	1649.04	35.6186	1142.67	72.3826	1432.06	41.8972	1121.59	11.3728	1123	162.2	1346.62	73.2227	1451.24	16.6522	428.42	19.7992	1679.89	15.3511	1015.1	23.8	1620.79	36.6025	1229.88	36.0932	1637.46	10.3222	1552.63	8.07558	1350.9	99.4547	1683.34	43.1219	1684.5	119.518	483.652	47.1942
1168.64	16.3862	1652.74	90.4561	1776.16	15.2415	1886.51	25.7549	1714	38	1859.61	38.8538	1916	12	1649.61	18.7352	1144.42	100.325	1933.76	4.05294	1134.46	11.3758	1133.1	71.4	1349.87	78.3154	1451.55	17.7686	429.12	10.4481	1684.01	12.7865	1234.6	52.7	1625.24	38.5233	1305.48	33.584	1638.63	11.4914	621.077	5.44656	1351.37	70.5441	1683.44	50.2829	1684.52	39.9475	494.95	24.3925
1178.7	11.6884	1653.21	99.7792	1780.44	14.977	1904.49	25.9907	1715	38	2206.84	18.1213	1916	15	1651.48	25.7735	1145.98	37.5765	416.232	9.27072	1137.55	25.7923	1139	100.7	1352.36	52.1957	1456.12	15.738	433.483	11.603	1687.76	19.7732	2079.4	5.5	1642.83	49.644	1074.67	60.6136	1643.03	20.2028	2786.08	9.74048	1352.83	134.551	1683.97	75.0531	1685.2	46.5512	515.547	30.6964
1198.47	18.3177	1655.41	196.494	1785.01	12.4446	1947.48	46.6618	1724	47	1807.68	15.2885	1917	15	1652.39	22.9928	1149.73	22.1737	1436.69	69.1352	1152.29	15.5476	1157.9	31.7	1353.76	64.349	1457.2	12.9888	434.563	15.6967	1703.7	14.8606	541.6	12	1643.93	22.5682	1013.2	22.6269	1647.87	17.1182	1062.24	13.3526	1352.99	71.7516	1685.48	37.9956	1685.59	39.2946	515.91	42.0011
1228.63	10.4661	1656.58	63.2814	1785.38	15.5797	2018.91	46.9269	1725	33	1940.15	11.8161	1918	14	1653.55	33.7338	1161.08	47.8579	1907.54	7.37009	1163.45	10.6282	1160.9	42.2	1355.77	48.6144	1457.83	14.2211	435.431	8.99847	1717.4	11.6231	560.4	11.8	1653.42	55.7767	1394.95	31.3211	1650.79	10.6983	2789.16	5.18866	1354.82	70.5486	1687.46	38.6448	1685.95	46.9771	516.616	29.0399
1255.76	9.35407	1659.27	266.901	1786.15	11.9207	2037.06	49.4631	1726	45	1792.8	7.72947	1925	14	1654.4	28.9079	1162.26	35.8608	2792.07	3.30906	1171.88	17.3306	1176	138.8	1360.81	56.3776	1459.53	17.7612	436.408	9.67512	1718.85	34.9645	1976.2	6.6	1662.34	50.6771	1053.9	20.9234	1661.71	24.4099	1756.54	5.62994	1359.2	97.2904	1687.73	59.0638	1687.48	34.7293	518.346	30.8851
1291.85	17.2949	1659.94	100.26	1786.7	13.1651	2103.56	26.5532	1726	36	2679.22	10.4014	1925	14	1654.58	18.1649	1164.74	16.7193	1942.13	7.3231	1175.76	13.5408	1184.6	27.5	1366.4	78.808	1460.07	18.9618	439.446	9.38136	1720.69	7.31746	367.1	7	1666.77	54.8287	2708.14	7.37838	1665.04	8.7964	1849.31	6.93786	1360.4	60.1547	1687.91	80.3526	1688.89	54.4961	529.069	46.3722
1295.15	19.0104	1661.04	117.13	1788.68	14.4735	2281.95	58.0572	1730	39	1847.68	45.7131	1927	12	1654.77	22.6699	1169.88	41.9428	1628.05	18.7118	1181.92	44.9107	1191	16.7	1390.01	38.4124	1468.58	15.5662	440.539	11.8128	1725.55	22.834	1094	129.7	1675.21	64.4637	1106.36	74.9139	1677.49	5.04098	1930.17	4.52562	1363.71	118.387	1689.17	60.5658	1690.69	102.705	532.418	46.8392
1311.98	10.4869	1661.16	65.6636	1789.26	11.3054	2481.88	25.1047	1730	42	2072.69	28.232	1927	10	1655.06	29.2856	1171.02	29.9328	1784.32	7.31243	1185.07	16.0848	1194	50.2	1390.38	100.942	1505.74	13.4205	440.595	10.3143	1729.34	11.7309	2619.1	3.1	1676.06	26.0423	480.947	35.5081	1719.52	12.8903	1803.59	5.10917	1366.27	161.121	1689.45	91.9656	1695.76	93.986	536.372	40.6502
1318.84	14.0563	1661.4	116.243	1794.46	12.4587	2493.04	64.3323	1731	55	1837.32	38.2696	1928	10	1658.28	24.8184	1187.56	9.88568	989.557	17.2659	1189.83	10.9682	1208.9	55	1410.94	48.7926	1637.38	15.213	445.274	14.1493	1731.26	16.8707	674.9	6.3	1685.05	40.1815	1772.04	7.67581	1719.65	14.7087	1626.41	11.0448	1367.63	66.7612	1689.78	86.0931	1699.05	45.7621	537.849	71.4939
1324.82	15.0928	1661.81	53.5939	1796.79	11.1282	2633.52	28.0501	1733	52	1844.14	30.961	1929	11	1658.36	32.0784	1212.84	23.4455	2646.7	25.9665	1192.63	14.5968	1209.2	69.3	1416.48	97.5604	1659.29	13.529	445.706	13.7091	1740.7	31.9429	2577.1	6	1691.66	47.1346	1885.72	14.3685	1742.59	16.5907	1053.27	47.8985	1368.19	95.0356	1690.14	51.8272	1699.37	83.7443	542.947	22.2247
1348.73	14.4545	1662.44	127.026	1799.16	12.4894	2717.78	20.9331	1735	65	346.445	3.7123	1930	11	1660.03	26.2943	1214.85	19.0513	1663.37	15.0719	1199.88	12.0645	1238.7	29.2	1575.09	28.2953	1666.5	13.9698	446.138	12.6464	1743.89	18.8975	607.1	12.4	1705.64	40.6746	2826.49	6.14272	1750.95	17.8481	1456.64	10.2508	1368.92	198.835	1690.46	50.4921	1700.17	31.8021	545.672	41.6873
1387.25	44.7476	1664	160.772	1805.32	13.4888	2810.5	30.1284	1739	28	1886.86	47.833	1938	13	1660.08	27.4139	1216.07	9.78993	1847.26	9.90401	1210.35	17.4771	1330.7	20.4	1580.09	89.1722	1669.44	14.2697	447.073	9.10621	1750.97	15.1	1226.7	6.7	1707.4	53.371	1817.57	19.4346	1759.7	7.84271	1649.28	3.75057	1369.41	67.2354	1691.11	35.382	1704.72	55.4046	547.512	69.2137
1422.11	12.2892	1664.62	220.903	1820.04	10.2533	2869.01	42.5987	1739	33	2777.38	9.43708	1940	13	1660.91	27.4105	1234.94	22.7195	2684.43	4.85085	1213.33	13.2819	1345.4	26.3	1582.7	44.3804	1669.56	14.7049	455.424	10.0102	1751.61	27.4964	1020.1	52.5	1707.84	39.6427	1868.85	25.2185	1806.61	11.4452	1051.77	32.2972	1372.12	146.222	1691.72	50.3789	1706.23	70.6405	550.909	29.0264
1436.08	13.1726	1664.75	58.7095	1821.89	12.024	4939.77	105.597	1739	55	2617.3	6.38074	1943	13	1661.8	21.3012	1240.59	41.6738	1636.18	13.1145	1222.1	15.2507	1398.5	14	1587.52	45.1189	1670.13	14.3502	456.471	9.01291	1764.38	9.30986	492.1	14.3	1711.02	35.7474	1914.54	12.898	1885.07	13.0306	1449.79	7.37007	1373.62	132.336	1693.11	54.1322	1706.41	61.5775	551.222	40.5575
1448.95	12.6318	1666.51	119.282	1842.56	12.7711			1740	16	1854.16	31.8464	1955	12	1662.12	45.3681	1245.59	17.9373	1460.28	6.82814	1236.36	11.8258	1405.7	29.8	1590.49	49.8982	1673.97	15.7376	462.699	14.4038	1768.44	17.4267	1175.6	40.9	1715.08	40.1559	1797.91	57.7929	1905.75	22.063	1509.95	13.459	1373.66	103.094	1693.57	83.494	1706.98	46.6507	551.445	56.73
1468.92	10.8484	1666.62	76.5153	1848.8	14.0845			1740	33	2024.28	71.5891	1967	16	1662.67	22.9795	1315.96	121.144	2540.03	4.81541	1260.94	15.0452	1409.4	37.7	1596.68	64.0362	1675.33	14.4977	463.646	12.517	1775.43	12.4044	2675.3	13.7	1725.36	20.4722	508.898	25.7837	1906.05	12.4698	1905.12	9.65888	1373.72	88.1877	1694.2	45.538	1707.8	119.719	553.618	47.7715
1472.8	71.5706	1669.66	65.4605	1851.46	14.4226			1742	57	2616.45	6.70674	1978	12	1663	21.3058	1328.64	53.6112	1805.86	5.09729	1294.44	10.5761	1470.4	133.2	1597.8	53.523	1682.64	15.5729	465.898	11.2777	1787.55	7.50933	824.9	46	1749.78	38.3874	1582.57	155.089	1922.27	12.7661	1313.56	131.582	1376.73	118.317	1696.03	69.8959	1710.61	42.0497	555.853	39.604
1486.66	17.8451	1670.54	195.566	1879	12.5371			1743	25	1824.86	82.1199	1979	14	1663.04	37.401	1337.58	31.8384	1251.03	19.1944	1302.94	16.0992	1479.8	27.1	1603.66	49.7188	1687.78	14.5502	467.189	9.74017	1814.76	10.7694	2606.9	4.5	1758.36	29.917	420.155	14.1114	1927.87	22.7103	1443.89	12.0067	1378.3	129.395	1696.54	102.232	1710.7	57.3786	556.227	24.4827
1496.78	14.0522	1671.38	49.2755	2447.99	11.4168			1743	56	2663.54	10.0293	1981	14	1665.69	25.7391	1338.12	29.3739	2983.54	4.73564	1317.81	9.89316	1516.6	35.9	1604.68	69.3993	1688.55	13.7912	470.577	16.4347	1820.25	32.459	515.4	6.7	1761.12	35.7046	444.954	23.5047	1932.74	28.0026	1531.58	35.3717	1378.71	142.566	1697.22	60.9828	1712.84	48.3722	556.6	27.4002
1514.9	13.0807	1672.22	271.161	2620.92	13.7845			1748	27	2219.41	7.13215	1996	15	1666.74	26.4591	1358.78	21.6394	431.704	4.03952	1323.18	14.1585	1661.1	14.8	1605.26	78.6547	1688.85	14.9321	473.786	11.7418	1907.74	11.0256	523.9	15.9	1761.8	42.3637	1911.58	27.5718	1991.57	25.1867	1624.7	6.97554	1379.06	92.4645	1699.48	28.5286	1714.25	61.5521	557.54	42.3736
1532.4	12.8169	1674.86	66.7896	402.73	7.30576			1752	23	1843.86	11.7006	2047	13	1666.99	15.5467	1367.75	22.0074	1688.99	6.16422	1372	11.2652	1661.2	57.1	1606.02	72.2858	1691.63	12.4713	475.112	18.06	1940.69	15.297	691	6.1	1771.3	21.2911	1624.56	5.51793	2086.13	4.24103	1638.31	6.33006	1379.4	176.874	1700.63	86.4584	1717.9	31.5167	557.78	32.55
1545.7	13.1399	1675.59	132.089	596.798	14.7404			1755	45	1850.18	24.2674	2055	12	1667.52	11.689	1392.59	99.6388	2792.64	5.76352	1425.07	11.1885	1792.5	24.7	1608.95	64.8779	1699.69	21.0698	498.835	20.8859	1959.26	24.6552	1195.4	25.5	1783.48	42.6284	2728.96	13.9299	2332.17	29.8625	1646.03	30.9651	1380.03	148.23	1700.95	37.41	1718.46	119.832	559.435	55.4437
1566.58	11.4372	1675.71	81.9998	861.242	23.9478			1763	85	1984.98	10.7397	2078	20	1669.68	47.7256	1410.37	22.1996	2036.75	6.4092	1476.98	11.6806	1822.4	12.8	1609.38	56.5886	1699.93	15.4201	510.85	26.9323	1963.7	50.9135	343	5.2	1794.94	37.7054	1454.13	51.4065	2695.57	40.1027	1809.72	3.52832	1381.48	92.1669	1701.21	82.7345	1719.14	28.6635	562.088	25.4745
1597.17	10.57	1676.13	96.0589	1088.61	43.5781			1766	24	1851.04	25.6041	2080	13	1670.14	28.6639	1430.32	18.3549	1476.82	22.985	1503.54	11.7284	1861	16.2	1609.76	59.7496	1700.91	12.8925	512.983	23.4099	1982.06	18.1925	609.2	10.5	1826.35	52.4843			2754.25	12.3625	1683.25	13.3456	1383.93	114.631	1701.95	28.2024	1719.96	45.3372	564.283	62.4895
1599.23	11.9452	1676.82	56.9196	1092.62	44.5852			1768	43	1801.58	15.5261	2121	12	1674.31	26.9858	1435.86	6.99686	1033.91	14.6994	1577.21	10.9807	1864.3	8.1	1611.09	55.4608	1703.35	13.4795	517.173	16.3206	1985.8	18.0085	609.1	5.9	1831.47	35.7307			3105.91	3.94999	1504.06	13.2445	1385.97	103.14	1702.23	44.5397	1724.63	37.953	565.699	69.2802
1624.85	9.78333	1676.95	66.3215	1095.51	42.4535			1772	15	2732.41	11.9971	2308	12	1674.82	27.7218	1467.96	86.5542	1664.65	7.38901	1598.5	15.8079	1889.5	25.9	1615.98	71.9963	1703.53	16.8372	524.913	12.661	1995.36	14.5338	525.1	7.1	1852.74	56.1207					2804.63	2.05277	1387.34	174.421	1704.05	39.9718	1724.75	42.1872	573.82	76.9945
1630.05	11.0688	1676.99	95.1317	1108.96	48.6382			1772	47	2495.6	8.59983	2311	13	1675.08	22.9286	1472.73	13.7312	1458.8	14.3456	1611.92	11.8528	1897.6	10.1	1618.11	77.7348	1703.87	17.3488	525.286	14.2574	2012.95	23.9752	1241.3	25.1	1860.64	50.6937					1228.17	10.8954	1390.89	191.939	1705.56	47.7724	1725.64	30.4095	574.442	23.0697
1649.06	12.5425	1678.54	144.036	1126.56	74.3513			1774	26	1897.07	29.203	2356	12	1675.76	24.8724	1490.43	17.0823			1637.04	11.7063	1911.1	7	1619.94	57.614	1704.76	13.2526	525.714	14.9436	2062.89	18.5562	566.8	7.9	1870.93	44.2275					454.711	13.2238	1392.56	82.3746	1707.99	43.1197	1725.92	53.033	575.581	31.1706
1651.03	12.8152	1678.72	110.099	1128.56	54.7905			1775	38	1861.14	9.99541	2395	13	1681.7	29.0034	1490.64	9.71933			1651.12	9.68026	1916.8	28.9	1622.14	65.8649	1705.49	15.2293	539.807	14.7099	2222.96	13.5973	558	5.7	1890.84	54.8322					1796.04	2.82527	1395.82	122.192	1708.01	38.7419	1726.1	74.8717	577.569	42.2559
1667.61	12.7058	1678.73	131.101	1137.31	39.1203			1780	54	1854.32	8.42355	2418	12	1681.92	10.8998	1490.94	17.8899			1656.26	12.1227	2048.5	20.7	1623.63	85.6263	1709.27	14.6569	550.631	12.4124	2569.28	11.1056	1155.1	28.6	1894.98	51.9764					1639.78	23.4581	1398.36	154.822	1709.01	113.037	1726.75	101.408	580.759	42.1732
1695.97	11.7236	1679.24	128.896	1146.87	63.2936			1806	37	1864.83	60.2434	2476	10	1682.14	32.8693	1492.63	25.1865			1663.6	12.8218	2727.2	8.8	1624.73	90.0763	1710.05	16.4224	557.618	16.7619	2608.91	17.4425	1380.4	50.8	1900.01	36.3343					1758.65	10.7564	1398.42	205.844	1711	51.2286	1733.83	30.4443	581.232	29.7277
1703.51	13.4178	1679.7	112.977	1154.64	52.9073			1810	65	1856.18	87.3822	2494	12	1682.42	23.8187	1541.35	17.9152			1676.71	12.9988	2816	11.8	1625.14	48.3609	1711.33	15.531	569.073	16.7792	2773.07	16.468	1067.6	38.4	1922.57	28.1195					1534.11	17.3356	1399.07	238.952	1712.6	46.3747	1734.49	74.0346	581.821	78.8863
1704.08	9.38339	1679.81	136.393	1247.64	35.4992			1816	71	1949.59	19.8662	2532	10	1684.32	12.9226	1560.69	7.49491			1688.33	10.7917	2858.1	8.8	1625.84	87.4793	1714.67	16.5926	587.787	17.4671	2862.45	9.44672	1747.2	43.4	1922.88	44.8492					979.779	61.6146	1403.27	113.481	1712.84	56.7095	1736.08	60.9042	583.653	24.7919
1718.75	11.9206	1681.31	124.755	1265.78	56.7505			1820	43	2006.74	13.6763	2557	14	1687.5	23.4958	1567.81	13.0799			1749.99	12.9702			1626.99	73.4696	1717.73	14.3804	615.538	14.1675	2928.82	9.16274	563.8	21.8	1978.35	27.3104					1684.46	18.2099	1403.4	61.2752	1713.42	84.7279	1741.52	70.0719	584.166	27.3089
1726.97	9.90583	1684.29	87.3783	1333.98	54.0816			1824	40	2567.99	12.1995	2557	10	1688.05	20.853	1635.07	25.6308			1750.28	9.03789			1628.38	67.1763	1717.99	13.3913	653.162	10.0949	3755.89	5.39827	867.4	14	1994.69	40.9186					2179.89	43.9153	1404.23	110.868	1713.42	74.5847	1744.59	90.3315	587.227	35.6431
1749.63	13.916	1684.38	81.6499	1338.45	53.0549			1846	38	1765.38	42.5125	2561	9	1689.28	43.8684	1650.58	15.342			1758.7	8.98259			1629.62	80.7758	1723.99	16.0268	680.681	19.3948	393.483	10.8877	351.2	7.9	2013.86	21.8157					1736.24	2.82392	1410	140.183	1714.19	57.3034	1751.74	43.6958	587.525	24.1798
1779.05	9.60483	1687.15	67.8285	1342.38	135.071			1854	19	1786.5	10.8178	2563	8	1690.03	23.1061	1754.12	27.8264			1777.48	11.3891			1630.15	62.9902	1725.91	15.381	736.632	41.1082	422.618	17.4521	1494.6	16.9	2014.22	37.1428					1276.27	7.40896	1410.64	72.8625	1714.54	37.288	1752.12	51.5024	592.663	37.1586
1780.75	11.6302	1688.24	78.5576	1351.13	56.1465			1861	52	340.154	7.56207	2571	9	1693.32	19.9552	1838.8	21.9596			1815.54	12.1735			1632.44	71.4486	1727.97	15.8506	792.983	37.9824	424.187	11.7707	1075.5	26	2083.92	24.8376					1750.01	9.37342	1416.12	74.3772	1715.11	40.306	1752.48	68.1738	593.521	36.5072
1798.39	11.6453	1689.11	57.887	1356.18	34.0791			1874	78	1843.55	31.0104	2577	8	1695.14	22.8663	1907.6	17.3804			1826.21	9.12008			1633.7	57.4394	1728.71	13.9813	868.463	24.4433	432.819	21.0227	997.7	103.1	2145.32	41.3899					1910.65	4.47396	1431.92	146.004	1715.43	106.998	1752.61	116.706	599.282	48.7476
1844.51	9.55451	1689.33	91.4519	1363.2	42.4908			1883	38	1823.46	17.77	2578	10	1699.19	34.4617	2078.74	28.8718			1840.08	10.0062			1635.98	41.265	1730.05	13.2642	875.567	43.2555	450.187	26.0189	623.3	13	2202.79	44.2425					1003.58	26.9038	1448.64	148.446	1715.78	78.3033	1754.66	39.945	601.484	47.9419
1852.85	9.4804	1690.16	72.3434	1366.36	98.5262			1895	44	1858.56	22.8964	2585	12	1699.61	24.5346					1893.15	10.9195			1637.3	59.3871	1732.26	15.6529	887.45	44.7486	460.648	19.4053	608.5	23	2237.62	38.6414					1791.55	3.7308	1458.16	75.3478	1716.92	66.5795	1755.71	46.5305	603.548	28.6692
2631.61	9.97131	1690.66	68.5352	1368.03	44.6744			1904	34	1887.59	75.4241	2639	11	1700.48	18.2412					2308.87	10.0399			1638.2	56.1624	1733.25	16.6249	893.881	17.5412	464.389	12.0079	1039.9	55.9	2538.28	54.2658					940.113	31.0401	1458.42	140.463	1717.84	47.8544	1758.3	33.2308	608.924	32.6807
2634.28	17.9131	1690.83	110.633	1368.16	59.121			1923	76	2092.61	22.4671	2639	16	1700.48	19.1684					2643.61	10.1564			1639.09	105.07	1733.62	18.1126	893.976	28.0636	478.957	15.5397	2313.7	21.8	2596.17	55.1969					1350.99	7.47746	1500.77	128.038	1719.26	87.282	1760.23	43.4263	618.025	40.4287
2674.56	11.6582	1690.94	111.955	1371.63	31.1814			1933	44	1835.9	16.1208	2644	13	1703.69	9.25075					2675.23	9.45676			1641.41	59.1126	1734.88	15.429	926.452	133.764	707.45	61.3779	439.1	16	2622.8	36.6673					1240.91	27.0904	1572.31	197.148	1719.73	71.5635	1761.77	115.967	618.877	42.6472
2689.13	8.28767	1691.45	98.3436	1373.27	50.4008			1942	24	1777.32	30.4311	2653	12	1717.09	19.3023					2717.47	9.01411			1641.91	77.4446	1736.35	13.0138	967.976	40.7339	947.205	68.1073	1891.3	9.4	2626.58	37.0112							1594.66	98.3041	1724.35	58.885	1772.02	72.5008	623.504	22.2118
2701.17	11.602	1691.75	81.4929	1375.68	48.4919			1943	43	1917.05	45.8799	2653	11	1719.66	13.5996					2741.11	10.1559			1643.13	126.513	1737.45	13.8834	978.896	64.8895	954.905	14.974	1611.1	23	2679.52	51.1595							1604.42	67.7499	1725.4	48.1316	1779.15	101.813	627.777	32.2622
2709.22	9.99521	1691.96	215.039	1376.06	50.1813			1959	45	1925.61	68.4466	2656	11	1761.15	25.2359					2742.63	11.5388			1646.38	104.728	1743.25	18.8174	982.672	60.1424	978.622	75.5579	460.7	14.9	2825.12	21.5831							1604.69	142.64	1726.72	46.0282	1794.81	104.01	632.741	22.7244
2811.78	9.71682	1692.04	171.51	1376.23	50.3874			1989	58	1385.24	32.7115	2685	10	1765.25	23.0243					2764.9	10.5208			1654.64	52.9848	1745.32	17.9599	983.441	35.0735	981.507	25.5894	1140.3	22.8	2907.22	64.5217							1605.19	69.3089	1727.4	68.8931	1797.47	73.6833	649.459	34.4629
2814.77	10.9149	1692.3	81.4182	1377.16	43.8657			1999	35	2703.76	9.6569	2702	9	1787.52	30.6141					2794.4	11.3674			1654.93	82.4499	1764.45	16.3273	994.553	29.2675	982.127	35.1163	944.6	24.1	2962.93	49.0537							1611.57	129.72	1729.67	46.4532	1826.43	44.9966	655.143	37.2069
3502.58	9.48421	1694.21	77.2971	1381.25	34.2714			2526	26	2598.23	5.78832	2739	11	1806.8	14.8307					2835.94	27.6179			1654.95	82.6774	1836.87	15.2641	997.334	40.9325	984.429	68.0656	1279.6	104.5	2978.93	16.4304							1616.61	113.478	1731.05	38.6919	1867.67	70.4396	813.884	49.2549
		1695.47	114.84	1382.13	39.6027			502	16	1875.43	12.6974	2796	12	1822.33	17.4361					2902.06	7.21864			1655.49	40.0242	3092.81	12.0575	1000.78	104.781	996.04	57.3543	1095.5	4.2									1620.9	185.368	1731.6	42.0601	335.711	5.10509	822.102	37.583
		1695.78	125.372	1394.56	37.7024			520	11	1861.53	132.331	2822	12	1840.62	22.0953					2912.13	8.32288			1656.31	45.9166			1009.19	33.5576	1008.1	44.2646	1055.2	38.8									1621.34	80.3765	1733.45	59.6821	1417.61	55.6537	863.245	59.0438
		1695.81	58.2385	1395.05	48.6736			521	11	2084.9	27.5507	2852	13	1843.18	20.6437									1658.33	36.4067			1012.15	50.9864	1010.16	25.195	1042.8	45.1									1622.39	184.327	1733.55	55.9343	1454.41	24.7966	975.251	57.1411
		1695.95	77.771	1397.24	81.7754			1037	34	1861.02	25.46	2918	11	1843.51	28.5954									1659.79	54.7616			1013.97	124.816	1012.39	16.45	1089.4	119.1									1624.48	203.92	1739.5	100.161	1560.09	44.5026	990.001	72.4388
		1696.08	153.927	1397.92	29.4634			1105	73	1818.1	16.0521	2974	12	1850.41	50.1559									1662.71	60.3016			1014.13	48.9624	1013.38	78.7329	1053.1	34.3									1632.19	73.1213	1742.41	59.7466	1568.11	41.4145	1016	63.672
		1696.93	92.3929	1399.37	48.7845			1131	63			2643	9	1913.44	38.674									1664.82	34.5549			1021.14	94.4217	1015.01	51.1904	1151.6	105.8									1632.25	93.0801	1744.13	51.3651	1568.57	49.8798	1016.7	43.0384
		1696.96	68.7874	1404.36	108.011			1338	117			1971	9	1918.39	14.3787									1672.28	88.1174			1021.62	45.4912	1017.43	35.4819	1890.5	10.5									1636.44	96.7259	1744.57	108.968	1586.67	45.4273	1020.98	67.4178
		1700.35	111.829	1409.74	73.8776			1343	31			1833	32	2713.74	12.8652									1674.93	46.1609			1031.46	35.0141	1021.85	63.258	1013.3	116.8									1638.97	92.4752	1752.44	67.6041	1588.16	93.153	1027.16	94.5327
		1700.4	173.342	1413.14	43.2096			1352	33			1786	7	2747.84	18.2497									1675.67	72.7374			1037.23	48.8907	1026.72	41.0668	1102	17.5									1642.83	173.373	1754.18	40.185	1604.67	62.0343	1028.54	253.225
		1701.2	148.006	1421.71	34.0862			1363	42			2020	6	2765.28	12.3168									1687.15	44.5554			1039.16	32.2882	1029.04	58.0535	1103.7	50									1643.36	124.808	1756.92	53.0698	1606.88	46.8522	1038.32	64.3118
		1702.33	98.9643	1422.54	85.1529			1364	30			1851	27											1689.1	58.3827			1043.7	132.839	1032.65	79.0391	1682.2	10.9									1643.98	115.426	1757.97	47.7842	1614.64	73.4859	1040.75	107.622
		1703.12	70.6026	1425.28	78.1684			1369	45			1827	68											1702.23	56.6784			1043.98	47.4171	1033.44	14.6214	1023.1	7.4									1646.27	82.7328	1760.03	68.4323	1624.48	29.4807	1041.31	64.8541
		1706.54	249.568	1426.9	66.1572			1371	29			2791	14											1723.64	116.325			1049.5	40.043	1033.59	27.5093	1644.9	19.1									1646.32	174.592	1780.09	62.1663	1628.16	97.2094	1049.7	76.2438
		1708.71	68.835	1429.38	44.8512			1372	62			2571	14											1944.9	94.9376			1055.43	144.545	1040.11	52.2986	1800.6	5.4									1646.98	178.921	1782.09	36.4312	1632.51	32.4198	1053.59	86.3142
		1708.89	75.7764	1433.12	91.3312			1376	28			1849	44															1055.75	62.5074	1041.47	77.8515	1112.5	14.5									1648.81	56.6047	1785.43	70.9439	1634.24	25.5518	1065.07	62.9995
		1709.6	61.4312	1436.48	42.1559			1382	22			1875	20															1056.45	32.4125	1043.03	30.7405	1084.6	43.8									1649.24	253.402	1790.42	75.0131	1641.34	57.8291	1066.27	71.29
		1713.32	139.239	1437.14	32.9446			1389	31			2689	9															1061.18	45.2579	1043.5	33.1552	1030	128.5									1649.52	127.323	1799.51	84.9191	1642.72	66.0647	1076.87	77.1189
		1713.79	65.7658	1437.96	45.6819			1407	34			2084	10															1062.13	55.5014	1046.12	39.7883	434.9	12.6									1651.34	105.188	1802.08	32.697	1643.11	55.2449	1098.93	83.5182
		1715.74	123.584	1438.45	34.9826			1414	43			1849	9															1068.61	34.0596	1051.16	18.1542	1020.3	27.9									1651.91	98.5255	1817.89	41.7472	1648.98	34.9127	1120.91	174.916
		1717.52	131.488	1441.38	50.2435			1415	18			1791	11															1070.62	43.7228	1061.47	26.1301	2782.2	8									1653.47	112.916	1829.6	37.8061	1649.57	39.1386	1122.31	75.829
		1718.13	90.8048	1442.18	31.1275			1425	38			1998	11															1074.07	58.1682	1068.41	44.8585	1488.8	7.6									1653.91	154.239	1924.67	114.241	1652.16	59.1565	1124.63	69.331
		1719.63	78.0289	1442.27	42.3742			1428	28			1647	24															1077.08	78.6067	1071.59	26.2818	485.4	11.8									1654.99	107.571	2445.97	53.3511	1652.45	50.2947	1129.99	89.167
		1721.48	185.9	1443.04	46.3396			1433	29			1801	15															1077.57	34.7501	1072.7	44.4993	1619.9	8.9									1656.15	91.7205			1654.05	27.3585	1138.28	63.7114
		1725.76	68.7869	1448.03	100.969			1433	36			1696	19															1077.86	30.3237	1073.95	47.5142	1163.3	13.9									1658.11	173.259			1654.32	31.4885	1145.88	81.7742
		1726.69	217.523	1450.07	52.352			1434	54			1775	12															1080.52	85.1636	1074.94	41.1253	1024.4	96.4									1664.71	141.002			1658.1	35.6058	1153.28	96.4783
		1728.34	86.5086	1451.45	77.9703			1437	30			1935	5															1084.1	72.5668	1076.38	71.8397	456.9	14.9									1666.6	94.3124			1658.85	38.1772	1161.24	92.9705
		1730.08	82.5065	1453.25	46.7636			1444	31			1778	14															1085.02	67.2707	1076.65	39.5816	424	6.2									1667.59	86.212			1659.76	128.667	1170.17	151.318
		1730.82	175.705	1454.31	78.6148			1445	31			1904	17															1085.28	108.221	1093.58	27.8005	1316.1	12.3									1670.48	193.185			1661.27	39.2108	1188.77	91.0591
		1732.29	97.9194	1457.59	47.2139			1449	32			1808	7															1086.8	40.5036	1100.77	37.7419	425	5.9									1670.9	116.835			1661.88	30.0237	1195.73	220.701
		1750.31	160.208	1470.82	41.7892			1450	41			2014	15															1090.92	35.9839	1114.66	62.9728	1121	25.6									1671.78	99.7193			1662.3	68.5592	1232.72	85.5832
		1757.05	74.2162	1502.33	72.6332			1456	27			2679	9															1091.23	51.8441	1120.81	77.6097	1044.7	35.8									1674	110.151			1663.99	63.7592	1233.65	82.6209
		1761.07	173.971	1647.87	48.213			1459	69			1841	8															1097.93	34.5216	1129.21	64.8121	402.8	11.6									1675.43	114.529			1664.1	75.9981	1234.71	78.0619
		1767.7	100.178	1653	70.0081			1460	48			1971	41															1098.25	47.8094	1130.47	27.5069	1303.3	54.1									1675.9	72.3901			1666.31	33.3489	1265.37	91.1911
		1778.59	118.871	1654.72	66.6498			1461	37			1900	39															1103.16	44.4062	1131.65	38.6744	932.6	92.5									1676.04	91.9777			1666.41	67.1928	1282.92	193.088
		1793.26	95.9392	1659.44	47.424			1464	32			1789	20															1104.08	106.992	1133.46	34.2854	1135	49.1									1677.92	80.2449			1666.42	40.3783	1286.23	55.8219
		1834.43	81.3721	1661.54	36.9314			1466	25			1868	15															1105.76	49.3425	1136.26	53.1617	1057.5	15									1678.83	156.435			1666.55	78.8893	1292.3	162.247
		1872.1	73.0433	1669.97	36.5314			1467	40			1788	38															1110	56.0296	1145.81	28.5203	1461.6	29.7									1680.7	112.365			1668.01	84.6185	1300.75	62.9046
		1895.64	185.711	1671.82	29.1628			1470	38			1826	70															1110.02	97.5687	1146.64	18.9488	1078	26.6									1682.12	94.2572			1668.49	55.3344	1303.84	99.2106
		2026.15	60.2725	1674.97	29.0332			1490	23			1783	12															1111.89	35.7931	1151.82	24.676	1191.4	75.9									1682.18	78.5886			1668.57	36.3726	1308.92	81.3622
		2059.63	57.6487	1689.98	32.018			1547	67			2012	14															1115.02	91.7129	1172.89	24.7709	1169.5	21.5									1682.33	142.467			1670.76	28.1351	1318.23	103.129
		2078.84	106.956	1693.25	41.8755			1645	24			1838	24															1116.13	100.735	1174.32	50.9152	1155.6	18									1684.29	87.4877			1671.84	125.76	1321.54	76.9478
				1697.8	35.9821			1649	53			1948	41															1116.47	33.9976	1177.47	45.7218	1025.4	93.1									1684.4	113.838			1672.18	81.2469	1399.32	238.268
				1703.69	36.8502			1663	64			1938	33															1119.54	68.7283	1186.72	40.7367	959.5	46.9									1686.16	76.7233			1672.2	108.464	1400.02	100.025
				1703.69	39.7619			1672	54			1489	93															1121.28	98.0772	1202.46	51.3077	1538.2	32.1									1687.28	76.5485			1672.44	52.8072	1407.65	135.339
				1703.77	30.0607			1673	30			2549	14															1122.27	43.7671	1202.58	34.2537	1643.6	14.3									1688.12	140.878			1672.56	37.0298	1408.94	76.881
				1713.45	43.9353			1679	32			1854	21															1128.66	54.2999	1208.32	38.8907	2736.1	9									1692.6	87.7957			1673.18	38.2901	1412.88	67.121
				1714.07	34.517			1683	19			1833	32															1129.81	56.5688	1209.66	40.3911	1335.5	71.2									1693.88	163.2			1673.35	61.1728	1416.94	64.6514
				1718.79	84.5239			1687	31			1997	13															1130.1	46.4363	1209.83	63.885	1016	46.7									1694.46	87.906			1673.92	65.7724	1430.91	80.7451
				1721.43	41.7782			1687	25			2029	35															1132.52	123.852	1210.65	74.1806	1820.1	7.4									1695.08	106.748			1674.33	37.0724	1443.43	90.3155
				1723.18	51.9922			1690	38			2678	5															1134.93	30.8096	1216.68	28.929	1037.5	38.8									1695.81	91.8084			1674.54	70.3527	1447.83	143.992
				1728.45	43.9473			1692	41			1716	7															1140.74	35.62	1223.47	53.5694	1044	31.1									1699.52	183.192			1676.21	37.2495	1460.01	64.4482
				1729.9	29.3378			1693	30			1988	7															1142.08	52.9782	1227.86	25.0346	966.3	34.6									1701.05	48.5202			1676.25	40.6424	1462.71	67.0798
				1733.51	69.7815			1693	18			1841	48															1145.27	75.9944	1235.91	58.2458	1069.2	63.4									1704.34	272.999			1676.81	33.42	1475.95	170.132
				1745.33	41.669			1697	34			1778	7															1148.04	61.5831	1250.77	16.5483	1037.5	103.9									1707.92	209.659			1677.29	75.5185	1480.61	193.972
				1746.66	38.2772			1703	31			1445	16															1149.12	39.5102	1270.27	127.227	1009.4	140.9									1714.95	110.144			1677.44	35.294	1486.24	74.3208
				1749.86	30.9769			1703	21			1770	30															1150.69	65.1161	1272.42	65.3616	968.3	147.3									1716.96	155.545			1678.07	97.4949	1497.37	53.0361
				1751.39	58.2105			1706	29			1802	45															1153.79	31.9147	1281.33	14.6128	1079.7	13.1									1727.27	167.473			1678.88	51.1626	1503.7	107.278
				1751.47	34.0584			1706	27			1803	31															1155.13	73.7091	1307.07	48.1984	399.5	4.6									1732.7	98.7433			1679.14	31.7881	1503.9	75.826
				1755.42	58.9939			1708	38			1684	18															1155.57	82.5959	1317.93	71.9162	1077	76									1739.98	126.463			1680.28	137.159	1507.97	52.005
				1755.94	38.8881			1711	77			1868	26															1155.95	92.8	1327.02	22.6854	470.7	8.7									1809.01	140.077			1681.34	30.4124	1510.93	74.4854
				1757.46	32.0398			1716	24			1785	37															1158.83	28.6982	1377.58	38.2649	1636.7	20.2									1810.65	98.2931			1681.84	54.6561	1511.39	141.29
				1762.2	53.6533			1718	29			1821	41															1159.09	42.7379	1407.39	63.2698	1410.7	8.3													1681.97	104.409	1513.3	129.398
				1765.9	74.5214			1719	51			1821	23															1167.61	46.9794	1420.89	62.2811	1103.7	25.8													1682.43	37.7396	1514.67	135.17
				1765.96	34.7591			1722	37			1884	24															1169.53	73.0499	1421.29	25.7442	1332.8	86.6													1682.97	40.7362	1515.73	198.351
				1767.23	46.2952			1723	21			1765	44															1170.75	28.1395	1421.83	54.111	1638.9	23.5													1683.61	48.2514	1516.17	270.82
				1768.48	38.369			1727	25			1778	22															1170.88	32.314	1422.98	49.7945	1009.9	96.5													1683.64	45.1431	1522.77	60.1158
				1769	39.6555			1728	30			1666	23															1171.34	26.3867	1436.93	13.3531	1793.7	12.9													1684.17	55.5543	1527.58	71.9676
				1771.09	41.6713			1736	34			1830	21															1171.53	38.8008	1444.88	26.9114	1483.1	40.6													1684.9	103.594	1530.81	76.4349
				1771.25	49.386			1739	34			1844	20															1172.66	42.7486	1448.19	22.4884	1376.4	21.8													1686.27	41.8336	1530.96	65.0482
				1771.67	53.9991			1739	31			1837	31															1173.8	42.2064	1454.64	28.0901	1208.1	123.8													1686.43	60.2176	1543.47	123.771
				1773.81	35.6878			1739	25			1861	23															1177.92	53.3704	1517.59	31.984	1616.3	18.6													1686.57	25.3667	1555.6	202.358
				1775.18	37.7618			1743	39			1786	29															1180.4	39.788	1517.72	56.3647	1068.5	40.4													1686.58	49.4016	1571.37	51.5353
				1777.33	37.9616			1743	34			1808	25															1180.65	35.8296	1618.26	9.33173	2718.3	12.3													1686.59	30.5661	1577.55	48.5431
				1777.73	37.8341			1743	32			1853	41															1181.07	71.24	1636.57	49.4011	1398.7	19.1													1687.59	31.6051	1605.81	92.3761
				1778.5	25.2165			1750	28			1869	23															1184.2	29.3699	1648.81	47.6145	419.7	9.3													1688.36	36.5111	1606.2	265.648
				1779.71	57.8197			1751	35			1750	34															1184.46	40.1802	1650.09	21.2432	313.6	7.3													1688.87	55.7166	1624.37	62.0373
				1779.78	42.4972			1753	13			1838	25															1189.31	30.0174	1680.14	9.7617	314.4	9.2													1689.44	47.0379	1629.25	120.625
				1781.32	46.0038			1753	33			1868	35															1190.4	112.134	1735.6	12.4815	505.9	9.1													1690.53	61.087	1630.47	90.4872
				1781.32	32.8935			1754	26			1849	23															1198.79	80.1246	1779.42	16.8558	565.9	11													1690.72	40.3306	1640.09	78.763
				1782.12	43.8484			1754	18			1885	32															1201.18	54.6905	1841.46	7.90988	705.3	15.8													1691.66	57.8921	1645.15	236.591
				1787.82	45.3021			1755	29			1850	26															1201.38	46.9789	1880.63	12.3013	715.8	17.4													1691.85	55.6126	1648.06	97.2334
				1789.73	40.2604			1756	19			1882	23															1204.54	120.637	2013.99	17.851	727.9	14.6													1692.39	31.3328	1649.73	107.88
				1789.95	38.3001			1762	29			1860	25															1204.55	44.5198	2095.25	10.1414	868.3	25.3													1692.81	48.8618	1650.82	164.131
				1790.18	33.8914			1763	48			1800	44															1212.3	60.388	2632.35	11.6817	967.1	15													1693.44	42.9798	1651.46	135.551
				1794.64	49.2251			1767	32			1898	26															1212.94	23.4228	2776.1	9.10144	997.4	20.1													1694.08	119.508	1653.18	140.858
				1797.45	50.182			1767	21			1918	37															1218.78	116.534	2817.11	10.5667	1000.1	14.8													1694.21	33.7318	1654.39	107.088
				1798.74	40.7916			1768	29			1944	30															1221.76	65.3871	380.617	9.90887	1006.7	19.1													1694.5	36.5042	1655.71	120.267
				1800.05	32.4616			1780	37			2132	27															1226.31	84.7625	410.148	10.4969	1019.7	14.4													1694.74	56.3331	1659.04	65.6243
				1801.78	39.6515			1780	23			2127	25															1229.95	38.5732	410.863	11.3781	1034.2	24.5													1695.18	26.1807	1663.23	62.8882
				1802.07	40.2474			1784	37			2177	24															1235.84	63.5662	411.66	33.1236	1041.6	16.8													1695.23	93.2055	1664.61	91.4099
				1803.12	29.1571			1786	15			2294	24															1238.1	37.6909	412.307	9.39053	1058.1	13.8													1695.28	79.286	1666.15	176.274
				1803.99	32.408			1789	22			2529	55															1241.32	48.6348	412.878	7.23243	1065.8	16.2													1695.51	33.2645	1668.72	142.7
				1804.46	37.7814			1818	29			2594	28															1242.55	35.1278	418.951	12.4627	1070.2	18.7													1698.56	59.8496	1672.95	78.5737
				1805.18	33.2111			1842	23			2723	68															1244.84	55.2835	425.36	12.4572	1074.4	22.6													1699.96	53.826	1674.77	157.89
				1805.95	35.2434			1856	35			1851	54															1252.43	48.5265	426.668	6.11531	1132	146													1700.58	46.0017	1675.27	85.7851
				1812.98	28.9974			1927	22			550	28															1252.48	41.15	434.44	23.19	1136.9	20.4													1700.89	49.7067	1678.24	99.8021
				1813.01	37.917			1945	30			1031	92															1253.6	45.5907	436.491	23.1536	1146.2	15.7													1701.16	39.3911	1686.01	95.8753
				1815.27	77.8273			2084	28			1757	54															1256.79	57.1671	439.697	12.7906	1171.3	12.6													1701.62	61.7278	1691.7	166.02
				1815.58	24.1269			2435	30			1807	55															1265.09	37.3202	447.677	9.43051	1217.6	18.8													1702.03	56.9027	1697.16	71.1555
				1826.28	42.9129			2536	18			1815	11															1277.47	57.8646	464.063	17.5481	1227.6	15.8													1702.69	32.4277	1700.44	77.4359
				1829.42	69.3068			2716	42			1824	14															1281.83	37.1966	470.249	29.5072	1233.2	17.3													1704.65	34.5529	1709.35	220.196
				1831.25	53.9483			3180	22			1825	30															1293.64	31.7905	476.335	16.2498	1235.9	21.3													1704.8	76.7331	1710.94	79.236
				1833.72	42.8301			510	20			1825	35															1295.11	36.1154	479.42	12.4049	1240.9	14.3													1706.59	61.9217	1711.55	52.0447
				1839.37	31.4405			520	17			1831	72															1297.29	29.7384	479.528	25.8671	1316.7	17													1706.76	27.0763	1715.94	65.8273
				1851.06	66.3518			1105	95			1831	38															1307.01	64.101	484.767	27.9993	1317.4	20.2													1706.95	130.648	1734.7	61.8105
				1851.94	44.7282			1116	97			1833	29															1320.58	33.3488	538.343	28.2103	1324	14.3													1707.26	41.3547	1741.98	169.984
				1861.33	34.0713			1120	33			1834	29															1331.4	31.7701	547.946	20.3159	1355.2	16.4													1707.75	41.1906	1749.48	63.405
				1865.33	48.5197			1246	49			1836	22															1333.43	31.8938	569.627	15.974	1361.3	15.5													1707.86	68.8346	1756.43	180.76
				1866.92	45.3549			1252	62			1836	33															1336.12	43.9545	624.283	22.2548	1415.1	21.3													1708.94	39.1604	1762.92	65.3416
				1876.51	38.6537			1266	43			1837	20															1337.69	26.9326	725.689	17.2048	1467.6	12.3													1709.21	44.8653	1766.28	119.588
				1883.05	40.2035			1358	30			1838	27															1351.16	29.1569	739.766	15.2882	1477.3	12.2													1710.56	27.7142	1771.84	51.323
				1889.1	46.6399			1363	47			1838	13															1355.94	83.1663	868.195	30.2264	1639.5	15.9													1711.56	30.8075	1806.69	66.1092
				1931.71	27.9271			1363	34			1839	29															1362.79	61.0751	946.007	59.6887	1655.6	15.5													1712.16	25.3678	1817.52	54.421
				1989.08	36.7623			1363	20			1840	9															1372.18	47.9367	946.541	16.5675	1657.6	12.2													1712.5	40.8918	1821.75	57.3238
				1991.85	47.8195			1374	74			1841	12															1373.07	36.7215	959.055	80.8996	1694.2	17.8													1712.74	76.9127	1826.43	61.9728
				2499.76	26.4756			1410	30			1842	9															1373.6	45.0295	961.665	64.5879	1706.4	15.8													1713.3	116.558	1851.58	64.5603
				2672.44	25.5721			1416	47			1843	49															1375.77	56.1424	962.569	38.5786	1765.2	13.3													1715.09	44.1677	1868.67	184.793
				2724.81	34.411			1418	50			1845	16															1376.02	100.105	965.008	93.3974	1822.3	16.6													1715.25	49.0008	1876.67	144.819
				2760.89	29.2197			1422	38			1845	7															1376.32	62.0726	965.4	68.0697	1378.2	11.8													1715.89	56.8132	1877.44	52.8067
								1423	42			1845	8															1379.73	65.5189	976.156	44.4793	1749	13.6													1716.47	40.6441	1887.1	112.328
								1424	25			1846	11															1379.9	32.7876	979.164	52.7233	1329.4	9.2													1716.78	29.6932	1887.42	86.0652
								1431	107			1851	86															1380.03	39.7559	984.14	46.7887	1058	20.8													1718.13	26.3042	1899.47	53.7516
								1432	30			1852	22															1393.58	53.0546	998.785	32.5236	1220	12													1718.57	34.9469	1939.04	39.4523
								1432	101			1853	27															1396.49	40.0629	1000.88	35.0203	1337.6	17.2													1719.14	28.2538	1943.79	212.295
								1434	48			1853	38															1399.24	46.9372	1005.98	44.7042	951.7	221.2													1719.83	129.529	1975.33	69.5754
								1435	49			1855	20															1399.37	27.3893	1008.33	35.0022	2090.2	18.9													1719.86	28.08	1978.17	166.621
								1439	28			1857	7															1400.47	27.29	1011.23	62.3668	2605.8	3.8													1720.2	23.8689	2042.82	74.0853
								1440	57			1861	31															1400.52	130.408	1012.42	54.678	1268.2	38.6													1720.81	27.4455	2115.78	146.424
								1441	48			1863	7															1413.76	41.0946	1012.48	28.4674	1708.4	31.6													1723.92	26.5694	2117.34	93.9901
								1443	45			1874	22															1415.74	36.6742	1016.66	98.1726	1801	45.7													1724.67	75.9922	2246.04	79.7237
								1443	61			1886	5															1420.35	33.6995	1019.45	58.7883	1089	38.4													1725.98	43.2592	2271.41	134.479
								1444	49			1889	57															1420.88	60.0542	1020.6	34.2832	59.8	1.8													1727.51	115.088	2400.82	81.1909
								1448	46			1893	26															1421.73	27.928	1022.04	48.3949	1646.7	17.2													1727.62	39.1473	2414.67	100.436
								1450	41			1894	31															1423.83	35.2781	1024.41	62.6536	1385.8	12.5													1730.77	34.8687	2613.84	202.161
								1451	72			1903	39															1425.18	29.3463	1028.21	7.0618	1081.5	10.2													1730.91	29.454	2623.97	100.949
								1451	20			1907	45															1429.53	26.871	1029.33	66.5475	1373.8	74.4													1731.1	25.6459	2674.85	182.983
								1456	43			1914	7															1429.74	57.0708	1035.54	30.1189	1924.6	93.8													1734.53	31.6136	2675.6	95.0619
								1458	57			1924	22															1441.34	33.9139	1036.1	48.2193	60.3	3.9													1735.53	38.7068	2737.22	189.609
								1463	41			1927	18															1442.76	38.415	1036.48	47.3486	381.1	19.8													1735.6	92.4401	2794.41	114.529
								1466	24			1932	39															1447.76	117.548	1040.59	59.7448	373.5	6.7													1737.87	87.1585	2797.47	66.7637
								1467	37			1935	10															1449.47	25.8104	1041.82	33.2586	1777.7	10.3													1739.03	37.2392	2860.69	165.83
								1471	30			1940	25															1451.1	91.4705	1041.99	43.8443	1680.2	8.5													1739.66	107.075
								1480	26			1941	18															1458.49	56.8836	1043.21	54.1989	1449	21.4													1739.88	53.9786
								1519	56			1942	20															1459.39	107.19	1046.54	25.5778	1446.7	38.8													1740.99	50.7659
								1557	48			1947	11															1489.12	25.4417	1049.61	51.4752	372.912	9.18742													1741.79	27.2155
								1631	34			1948	29															1490.17	49.4943	1053.88	34.1444	383.277	10.0051													1745.19	39.9903
								1657	35			1990	106															1493.38	33.1382	1055.59	44.5754	394.041	13.3016													1755.76	29.917
								1675	25			2009	21															1497.1	51.9424	1056.46	54.7828	395.763	22.3217													1757.06	86.0678
								1680	83			2028	22															1507.14	122.687	1060.5	50.2466	410.426	9.20858													1757.86	34.5755
								1684	28			2053	13															1525.08	57.6081	1065.91	14.8944	411.873	13.0409													1762.02	34.1175
								1687	59			2073	43															1537.01	88.6668	1066.04	37.6675	412.876	14.7789													1762.89	85.6162
								1689	32			2074	14															1547.63	67.6764	1067.7	51.9971	414.431	20.1586													1765.66	44.2255
								1690	39			2077	14															1567.61	45.1154	1068.83	28.2639	418.158	10.7816													1768.86	56.9484
								1692	46			2077	15															1575.1	35.7394	1070.34	39.1194	420.747	19.13													1789.67	45.729
								1692	53			2078	14															1598.01	35.1764	1070.81	24.8365	421.299	11.0408													1821.5	63.0354
								1693	45			2078	25															1598.67	75.1425	1072.22	24.3469	423.549	10.8813													1847.7	47.9585
								1696	28			2079	26															1604.04	44.4907	1074.05	53.4547	424.729	10.0861													1871.78	24.9516
								1697	42			2079	14															1617.9	85.3453	1075.29	72.9554	426.067	14.3158													2107.25	33.2921
								1698	23			2080	14															1621.55	43.707	1075.67	48.5215	426.906	11.0556
								1702	30			2081	8															1622.65	37.8646	1077.94	45.634	430.201	11.9936
								1703	39			2081	30															1629.52	32.309	1078.98	38.9418	441.792	11.905
								1704	29			2093	33															1635.9	40.0312	1079.7	35.7424	450.188	15.2489
								1704	37			2099	27															1640.3	115.042	1081.4	20.5586	451.443	14.2209
								1706	46			2100	21															1654.63	34.597	1081.66	69.6625	464.512	23.7996
								1708	29			2110	13															1661.98	87.1632	1082.13	26.8825	578.196	14.4382
								1712	38			2224	17															1663.98	67.8885	1083.48	77.851	851.747	28.6613
								1713	81			2289	16															1668.64	78.2891	1088.6	166.691	884.98	22.0026
								1714	46			2338	13															1672.42	27.5596	1090.28	54.1986	894.518	22.8767
								1718	40			2389	8															1675.45	31.2461	1098.63	12.62	952.707	53.6125
								1719	43			2525	9															1692.23	39.1296	1106.15	31.2946	974.193	151
								1720	51			2527	8															1695.02	81.4554	1106.54	48.6233	984.745	46.7624
								1724	30			2586	12															1695.6	45.543	1116.17	16.9482	1006.7	79.6544
								1731	51			2678	11															1697.38	52.2426	1116.87	55.2034	1010.66	48.7716
								1732	24			2688	8															1697.83	62.7265	1117.67	46.5497	1010.72	49.2543
								1733	26			2702	5															1712.82	40.0036	1117.95	49.9499	1012.09	84.7047
								1737	46			2708	5															1717.22	98.1263	1129.2	47.1533	1019.05	123.934
								1738	38			2717	10															1726.15	70.0435	1130.42	59.8004	1020.25	52.2634
								1742	32			2719	20															1726.24	36.7634	1144.3	55.9952	1023.15	52.0816
								1742	35			2722	8															1735.07	54.6441	1148.32	82.3809	1030.52	128.645
								1745	44			2723	7															1738.69	28.0501	1151.78	30.4901	1034.42	108.433
								1747	27			2746	16															1761.29	41.2531	1156.46	43.3277	1034.7	101.798
								1752	26			2748	24															1761.89	32.9118	1158.3	49.3699	1035.33	52.9278
								1757	34			2935	20															1777.1	47.2094	1168.98	57.5987	1042.44	65.4718
								1757	45			3219	7															1857.02	24.4958	1177.24	28.835	1047.5	134.419
								1758	30			1796	31															1870.73	84.7196	1178.89	41.0627	1050.13	68.9157
								1759	29			1746	25															1871.83	32.6191	1182.42	36.3948	1052.68	68.6377
								1761	13			1776	20															1922.6	58.7292	1190.27	43.0507	1056.46	52.9774
								1765	27			1765	30															1934.1	26.487	1190.68	24.7209	1057.5	49.434
								1767	18			1761	32															1954.04	23.5768	1190.73	10.4957	1057.92	67.7903
								1768	51			1861	22															2005.32	25.997	1194.91	21.1834	1061.42	87.4137
								1783	33			1834	25															2105.06	70.495	1202.8	59.3926	1065.02	54.0376
								1785	46			1883	20															2292.78	23.9231	1206.82	21.1902	1066.61	49.4675
								1800	23			1841	29															2366.58	26.6506	1206.97	28.6641	1066.87	60.2536
								1803	35			1833	26															2416.55	32.2733	1215.33	40.0726	1069.7	74.9133
								1821	44			1943	28															2468.08	37.5029	1215.44	71.6896	1070.65	49.7135
								1822	42			1793	33															2549.57	25.82	1230.06	43.705	1072.44	58.2596
								1844	33			1920	21															2619.53	41.8546	1233.12	68.482	1074.4	79.7166
								1868	42			1792	21															2647.46	21.8366	1238.26	57.9826	1076.73	67.5464
								1881	105			1844	46															2654.69	26.9732	1243.98	39.4559	1089.64	95.6688
								1898	13			1880	34															2703.3	26.5135	1245.51	46.1903	1097.08	50.895
								1907	15			1895	25															2704.08	64.9932	1245.54	71.1761	1097.67	55.5015
								2712	28			1900	22															2714.25	47.8939	1250.87	26.4404	1104.48	54.0666
												1855	20															2716.08	41.9689	1255.87	34.4183	1125.48	57.278
												1809	27															2733.77	61.0505	1259.94	26.739	1129.17	78.1613
												1806	32															2747.57	51.3469	1268.13	29.3551	1131.43	109.532
												1841	20															2752.48	50.9763	1275.3	73.4038	1138	69.8004
												1852	23															2754.33	36.0352	1307.6	34.089	1139.25	43.6343
												1809	39															2767.11	48.305	1315.17	45.4651	1140.86	84.3064
												1874	34															2768.23	17.9904	1324	67.2521	1150.89	142.957
												1790	24															2791.99	32.5279	1326.91	31.2519	1154.06	59.5081
												1964	26															2811.97	32.1427	1358.18	17.4714	1157.42	143.591
												2187	31															2822.03	60.2997	1365.29	87.0353	1159.64	54.1991
												2133	28															2984.15	27.19	1380.37	36.2762	1163.68	63.3728
												1984	24															3035.4	33.946	1394.45	34.0621	1170.66	54.7317
												2146	26															3709.93	39.7843	1402.89	69.2375	1172.69	74.5003
												2126	26															321.9	4.5	1408.08	39.5595	1176.53	94.7391
												1933	30															338	6	1410.01	52.7296	1180.07	72.2055
												2103	31															369.1	4.6	1411.18	29.034	1184.71	45.902
												2050	55															369.6	4.55	1418.07	44.854	1189.29	138.67
												2221	24															372	12.5	1418.68	15.1498	1203.06	99.4468
												2363	33															378.6	3.9	1431.85	64.6516	1205.15	86.6867
												2367	26															399.3	2.9	1433.08	43.0392	1208.07	49.5376
												2726	31															405	6.5	1437.7	19.208	1235.82	85.2323
												2695	44															413	6	1442.15	7.25206	1241.89	62.9076
												2753	31															426.8	4.2	1445.82	18.7071	1280.7	55.1834
																												429.9	5	1446.8	49.985	1286.85	107.832
																												431.5	5.5	1450.29	32.8948	1292.8	55.7717
																												431.8	5	1454.02	18.7481	1299.08	69.6734
																												445.2	5.5	1456.17	60.4192	1312.2	48.1535
																												447.3	4	1457.02	35.7738	1335.09	96.9096
																												452	6.5	1461.16	29.1982	1344.17	75.8988
																												454.7	4.7	1474.81	33.1946	1354.26	44.5841
																												455.6	5	1515.36	18.7003	1375.25	57.7136
																												459.2	4.85	1525.81	31.1111	1381.86	50.1395
																												464.3	5	1529.13	54.0072	1415.63	55.5309
																												473.2	5.5	1566.47	28.4202	1415.85	46.2277
																												499.6	6	1572.66	10.381	1445.27	87.8117
																												500	55	1622.59	43.9357	1451.01	44.0814
																												517.8	4.45	1626.95	42.7631	1460.66	55.4019
																												521	7.5	1637.27	83.3258	1469.55	43.9415
																												553	7.5	1637.63	15.3192	1476.68	71.9937
																												567	9.5	1646.56	19.0535	1489.51	57.5497
																												593	7	1650.05	27.9753	1515.16	99.5002
																												620	55	1656.76	66.3903	1517.8	52.3763
																												623.1	6	1663.15	18.4684	1528.39	74.4697
																												625.8	6.5	1664.37	44.0332	1545.43	48.0768
																												686	22	1668.29	25.8948	1559.5	57.1078
																												760	50	1669.59	13.2771	1584.12	49.255
																												877	21	1681.13	9.93001	1605.82	44.1291
																												903	10.5	1685.13	14.3376	1613.85	41.8692
																												905	10	1689.91	14.9607	1639.34	49.3014
																												910	9.5	1696.5	32.8599	1641	51.4072
																												917	12.5	1708.72	16.8589	1654.13	48.016
																												924	11	1722.69	15.5457	1744.85	42.9067
																												927	15	1738.86	23.5372	1751.96	68.3545
																												940	9	1743.31	30.9134	1753.51	49.7671
																												950	10	1747.31	12.5416	1759.56	53.656
																												956	13	1755	3.80056	1766	53.8588
																												968	10	1762.92	9.43233	1769.62	45.3286
																												972	12.5	1791.04	17.856	1769.81	40.5348
																												980	10.5	1792.28	31.9801	1770.43	85.1337
																												981	9.5	1823.19	11.4524	1773.72	38.4946
																												985	11	1847.19	17.672	1837.85	42.3382
																												986	10.5	1851.22	14.064	1874.64	53.4675
																												990	11.5	1877.16	24.7009	1881.94	42.1867
																												990	14	1878	10.3983	1897.97	91.384
																												991	11	1881.87	70.4652	1948.3	76.1958
																												991	14	1896.93	45.562	2435.17	38.6425
																												992	9	1900.39	6.66419	2522.51	108.478
																												996	9	1915.21	9.36416	2598.27	39.979
																												1001	10.5	2004.55	21.2657	2602.84	104.881
																												1007	10	2096.04	2.78102	2641.12	55.31
																												1009	13.5	2180.15	8.48703	2652.48	41.8996
																												1010	9.5	2692.38	12.7948	2876.95	40.6327
																												1011	11	2695.21	10.2448	2889.58	64.6613
																												1020	11	2704.96	12.1648	3103.34	37.8105
																												1021	12	2712.17	8.03046	371.681	11.8728
																												1024	12	2768.03	8.83687	391.866	17.5239
																												1025	9	2782.09	37.6981	394.408	11.1799
																												1027	8			401.486	23.4761
																												1031	15			411.159	23.0076
																												1032	12.5			412.926	13.3632
																												1035	10			414.779	8.33732
																												1035	10.5			415.827	19.0404
																												1036	10			417.589	13.4907
																												1040	10.5			424.204	28.4207
																												1044.7	8.5			447.466	13.6423
																												1048	10			462.539	12.8724
																												1050	24.5			468.002	12.3659
																												1065	15			480.944	31.0396
																												1069	11			486.515	21.9279
																												1081	11.5			486.975	32.7215
																												1083	11.5			590.496	32.6972
																												1083	11			870.385	27.7185
																												1090	10			947.242	70.8578
																												1098	5.5			953.008	110.576
																												1109	11			1000.38	47.7469
																												1114	11			1000.65	58.4821
																												1133	11			1033.08	80.8246
																												1135	9.5			1034.51	51.2878
																												1139	10			1042.28	111.055
																												1141	9.5			1062.42	76.0491
																												1142	12			1069.57	53.9002
																												1147	8.5			1072.65	68.9142
																												1148	12.5			1073.66	62.7306
																												1149	12			1076.79	91.8933
																												1155	10			1080.67	61.5904
																												1167	12			1081.75	87.4471
																												1185	9.5			1089.96	45.302
																												1194	14			1096.98	72.8357
																												1195	15			1108.04	45.1586
																												1215	11			1117.98	89.4033
																												1218	13			1118.7	72.0141
																												1226	13.5			1120.15	56.0991
																												1228	13.5			1125.8	58.2608
																												1247	13.5			1129.22	59.3889
																												1250	14			1135.17	56.9544
																												1252	12.5			1142.45	56.041
																												1253	15.5			1147.27	50.5242
																												1261	11			1148.34	58.503
																												1277	17.5			1158.36	65.3476
																												1373	29			1163.38	102.332
																												1404	24.5			1163.48	64.2155
																												1423	24.5			1165.3	103.205
																												1455	24			1169.25	45.171
																												1456	26.5			1173.83	59.1798
																												1468	25			1175.85	56.6019
																												1496	25.5			1186.68	47.0881
																												1536	38.5			1195.39	129.414
																												1597	41.5			1197.71	77.4024
																												1625	24			1202.11	92.7279
																												1637	24			1218.33	93.2176
																												1663	24.5			1224.91	70.8342
																												1715	24			1229.85	62.0387
																												1719	24			1239.29	63.5156
																												1760	33			1244.97	103.666
																												1764	23.5			1265.51	134.513
																												1792	19.5			1273.62	103.446
																												1799	23			1275.73	104.401
																												1946	24.5			1280.7	51.4624
																												2031	34.5			1292.21	56.8678
																												2469	25.5			1342.21	59.589
																												2520	21.5			1344.28	48.2215
																												2820	28.5			1345.76	73.8563
																												376.369	8.15396			1361.6	90.3663
																												394.366	11.7849			1382.01	52.4379
																												400.317	9.31588			1437.98	106.049
																												403.499	9.02302			1478.78	52.6497
																												414.676	8.29998			1485.01	45.4503
																												427.685	9.3409			1494.06	95.9181
																												440.957	8.54015			1522.21	98.4115
																												457.162	9.9923			1533.76	50.4795
																												460.395	11.1575			1551.53	54.0572
																												461.602	13.1401			1557.13	112.886
																												471.768	10.087			1559.58	117.047
																												483.083	8.15512			1619.59	81.2678
																												809.094	20.9631			1622.41	40.4836
																												940.088	15.876			1622.71	42.2258
																												993.841	20.5806			1644.45	64.4866
																												994.283	24.9215			1672	65.7365
																												995.851	20.2721			1734.58	128.822
																												1001.18	25.5276			1753.87	45.6286
																												1002.09	27.4209			1756.91	85.8334
																												1005.13	26.4564			1763.99	51.3086
																												1015.74	17.0474			1765.05	41.6324
																												1018.24	19.572			1774.78	53.6241
																												1022.72	19.0536			1787.38	48.929
																												1023.22	26.7126			1801.48	73.5017
																												1025.2	27.3721			1806.41	41.7554
																												1028.38	22.3152			1816.68	63.341
																												1029.13	18.6182			1829.39	43.2883
																												1035.32	22.0032			1855	57.6174
																												1039.98	24.852			1977.01	53.2307
																												1049.45	23.7575			2358.84	47.0219
																												1052.85	18.8204			2534.63	69.291
																												1053	15.2257			2563.17	92.7576
																												1054.32	20.2123			2714.55	57.2346
																												1058.82	18.2096			2790.46	43.626
																												1060.78	16.8826			2792.86	41.2467
																												1061.19	24.4668			350.598	22.2914
																												1062.1	17.4065			353.136	9.66764
																												1062.49	23.2595			357.378	12.954
																												1063.49	29.1903			359.047	9.56687
																												1064.3	23.6124			361.317	17.0536
																												1070.4	27.7903			365.548	9.55976
																												1071.46	21.7236			375.117	12.9951
																												1074.1	26.4855			409.858	13.2027
																												1077.84	20.2272			413.646	13.1672
																												1078.43	20.8021			421.967	18.5428
																												1079.48	18.8037			431.14	14.2611
																												1081.27	20.8494			437.887	27.1915
																												1084.06	27.2071			446.351	11.3956
																												1090.34	20.931			470.844	33.094
																												1098.89	17.4808			492.821	24.6896
																												1133.52	19.8174			528.118	28.2882
																												1133.83	17.23			542.355	21.8013
																												1156.65	16.4783			548.927	14.0206
																												1156.67	18.734			576.207	28.6968
																												1166.61	17.7276			589.599	13.895
																												1172.2	18.5223			596.372	37.9494
																												1180.22	15.495			653.095	23.294
																												1183.58	18.3215			847.942	23.54
																												1195.52	18.9526			858.856	31.4353
																												1203.12	22.1693			862.995	26.268
																												1279.08	21.2377			887.123	28.0903
																												1281.86	17.6297			961.098	133.119
																												1290.69	18.7091			971.33	100.918
																												1300.65	14.7535			984.071	73.2723
																												1315.55	18.7372			1029.4	64.4892
																												1340.92	20.9697			1033.34	57.4033
																												1353.19	21.4752			1036.89	62.7383
																												1365.53	20.1858			1045.08	68.7468
																												1379.81	16.0512			1047.37	52.182
																												1380.05	16.7622			1049.86	99.8106
																												1380.12	15.8519			1052.68	61.1034
																												1401.57	15.9803			1056.01	100.591
																												1408.06	27.6817			1081.19	133.876
																												1433.37	22.9005			1097.63	80.0692
																												1434.84	13.5857			1105.21	103.778
																												1439.65	17.7614			1106.79	78.3957
																												1443.35	24.3896			1107.85	95.4895
																												1463.94	18.3927			1114.44	62.3282
																												1464.53	18.9221			1127.03	54.4178
																												1472.26	19.8124			1127.79	55.5854
																												1482.56	20.1959			1137.21	87.2216
																												1495.1	19.1395			1138.12	64.5352
																												1498.32	14.8562			1143.83	47.4577
																												1507.4	14.8671			1151.62	124.402
																												1525.45	16.8671			1156.21	63.5705
																												1563.56	20.4447			1171.9	77.9027
																												1568.37	15.7964			1176.98	59.6854
																												1601.32	17.3831			1231.26	105.542
																												1602.43	22.6714			1285.88	66.1087
																												1621.1	18.7367			1287.08	55.1101
																												1621.42	15.2178			1297.14	76.6486
																												1638.78	18.2759			1297.27	96.48
																												1652.06	21.6842			1314.18	49.2072
																												1858.67	17.1411			1326.38	67.6048
																												1919.53	17.3165			1346.7	83.5675
																												1948.44	14.1971			1414.98	66.2776
																												2002.48	15.6983			1476.7	109.81
																												2034.25	23.9503			1515.79	90.9381
																												2105.9	15.9821			1572.97	76.1669
																												2468.44	20.1362			1599.91	65.4016
																												2577.41	16.0747			1612.37	59.4321
																												2717.61	13.1383			1638.15	51.6294
																												2719.29	15.9848			1659.38	56.1067
																												2917.39	16.6611			1665	47.8642
																																1670.37	75.3833
																																1675.68	55.5165
																																1677.25	61.7686
																																1786.46	60.0839
																																1810.63	47.2567
																																1831.08	47.1043
																																1850.83	51.3877
																																2664.22	82.5456
																																2693.51	42.5113
																																2835.67	71.0749
[truncated: 332 more columns]
